# Supplementary material for: Using liquid crystals to report molecular interactions between cationic antimicrobial peptides and lipid membranes
Source: Royal Society of Chemistry journal article supplement (doi:10.1039/c1an15743d), 2011-11-22
Supplement: c1an15743d.pdf [file c1an15743d.pdf]

**Electronic Supporting Information (ESI) for**  
**Using liquid crystals to report molecular interactions between**  
**cationic antimicrobial peptides and lipid membranes**

**Qiong-Zheng Hu and Chang-Hyun Jang\***

*College of BioNano Technology, Kyungwon University, San 65, Bokjeong-Dong,*

*Sujeong-Gu, Seongnam-City, Gyeonggi-Do, 461-701, Korea*

---

\*Corresponding author. Tel. +82-31-750-8555

*E-mail address: [chjang4u@kyungwon.ac.kr](mailto:chjang4u@kyungwon.ac.kr)*

**Figures:**

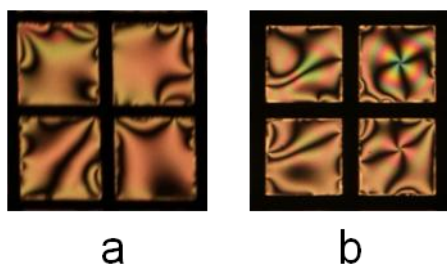

Fig. S1 Optical images of LCs viewed through a polarized light microscopy: (a) 2 h after the addition of 10 μM PGLa to the membrane-free LC interface, (b) 2 h after the addition of 10 μM PLL to the membrane-free LC interface.

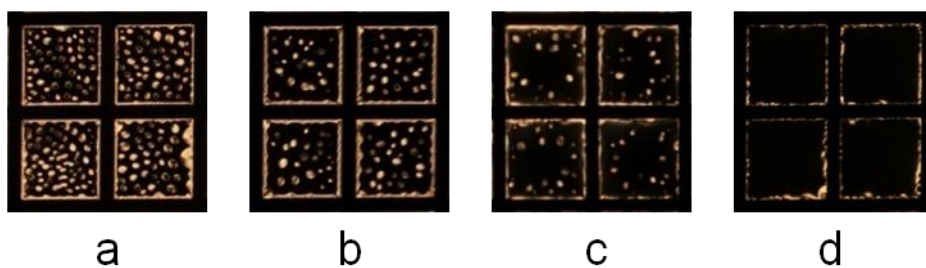

Fig. S2 Polarized light microscopy images of LCs: (a) 10 min after in contact with 10 μM polylysine, (b) 45 min after in contact with 1 μM polylysine, (c) 5 h after in contact with 0.5 μM polylysine, (d) 8 h after in contact with 0.1 μM polylysine.
